# Supplementary material
Source: HighWire-hosted journal article supplement (http://www.jrheum.org/highwire/filestream/29729/field_highwire_adjunct_files/0/141647DataSuppl.pdf)
Supplement: 141647DataSuppl.pdf [file 141647DataSuppl.pdf]

Online supplement to Increased Prevalence of Diastolic Heart Failure in Patients with Rheumatoid Arthritis Correlates with Active Disease, but Not with Treatment Type. *The Journal of Rheumatology*. doi:10.3899/jrheum.141647

### ONLINE SUPPLEMENTARY DATA

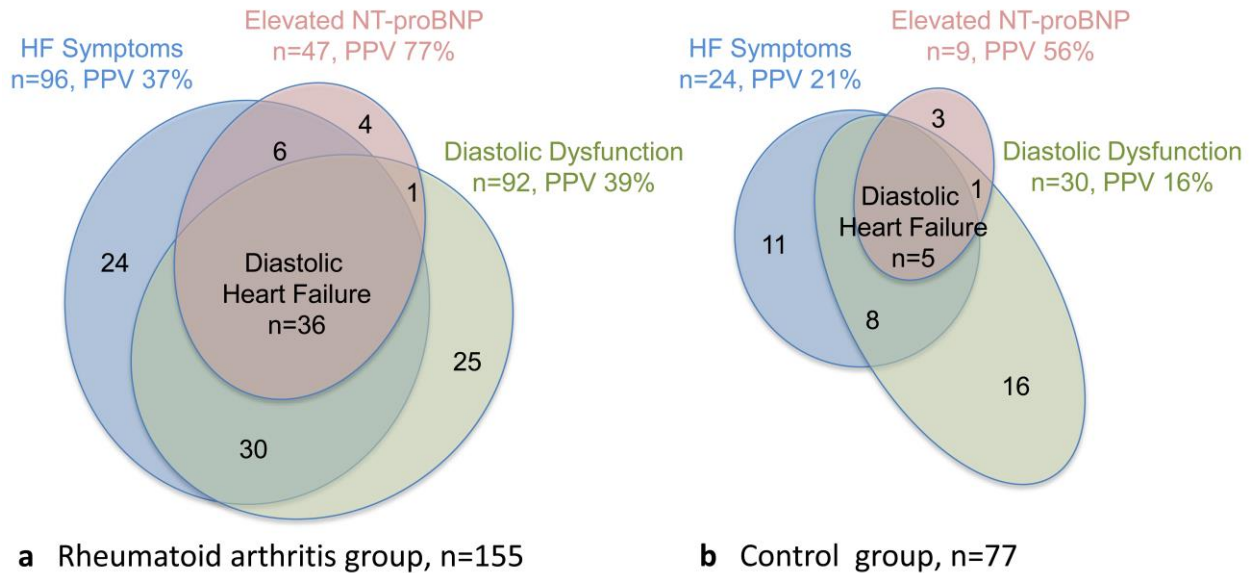

*Supplementary Figure 1.* Partial overlap of clinical symptoms, elevated NT-proBNP levels, diastolic dysfunction, and diastolic HF in patients with RA and control subjects. NT-proBNP, N-terminal pro B-type natriuretic peptide; HF: heart failure; RA: rheumatoid arthritis; PPV, positive predictive value.

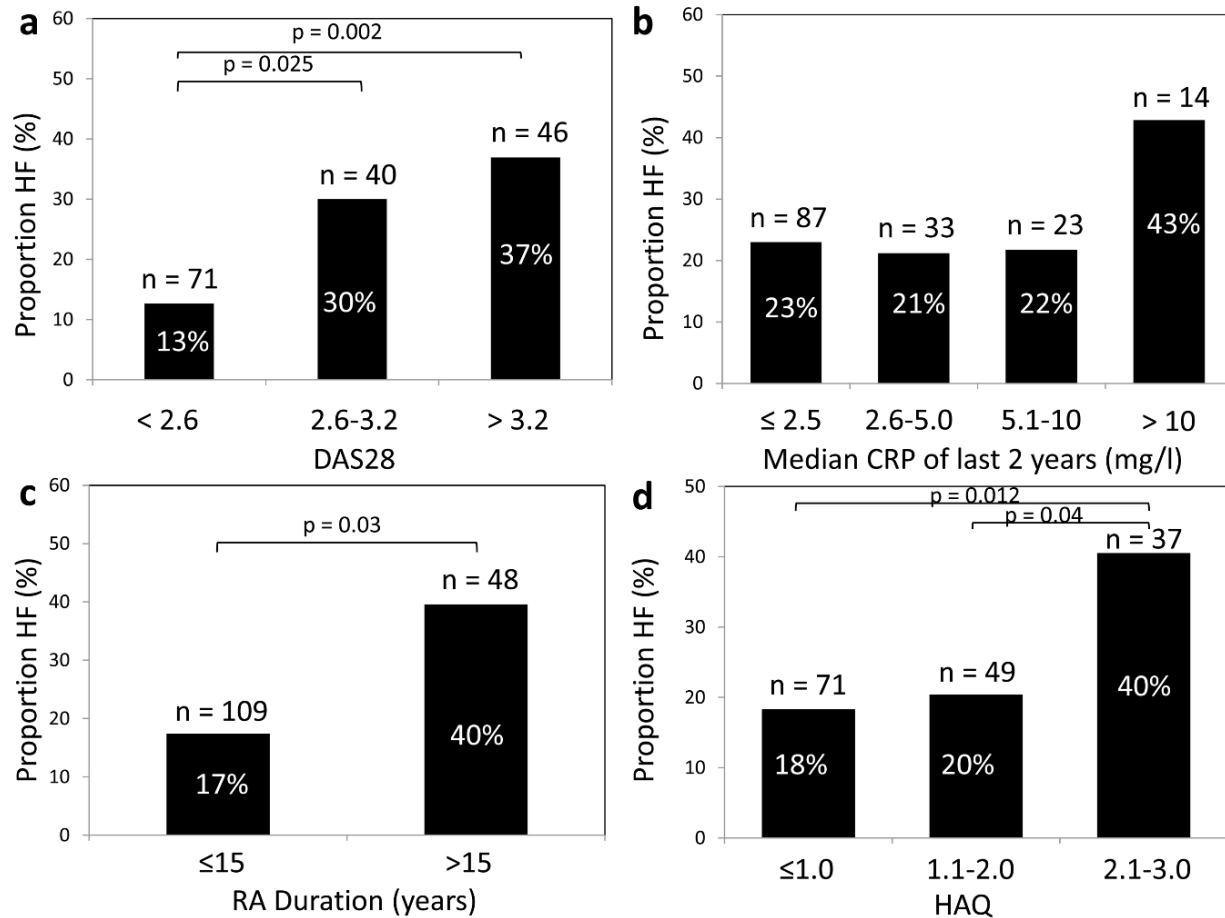

*Supplementary Figure 2.* Proportion of HF in relation to disease activity, duration, and destructive capability of RA. Proportion of HF rises significantly with increasing DAS28 (A). Median CRP/2 years > 10mg/l is associated with doubled HF prevalence (B). RA duration > 15 years is associated with significantly higher HF prevalence (C). In patients with HAQ score above 2.0, prevalence of HF was found significantly increased (D). HF: heart failure; RA: rheumatoid arthritis; DAS28: 28-joint disease activity score; CRP: C-reactive protein; HAQ: health assessment questionnaire.

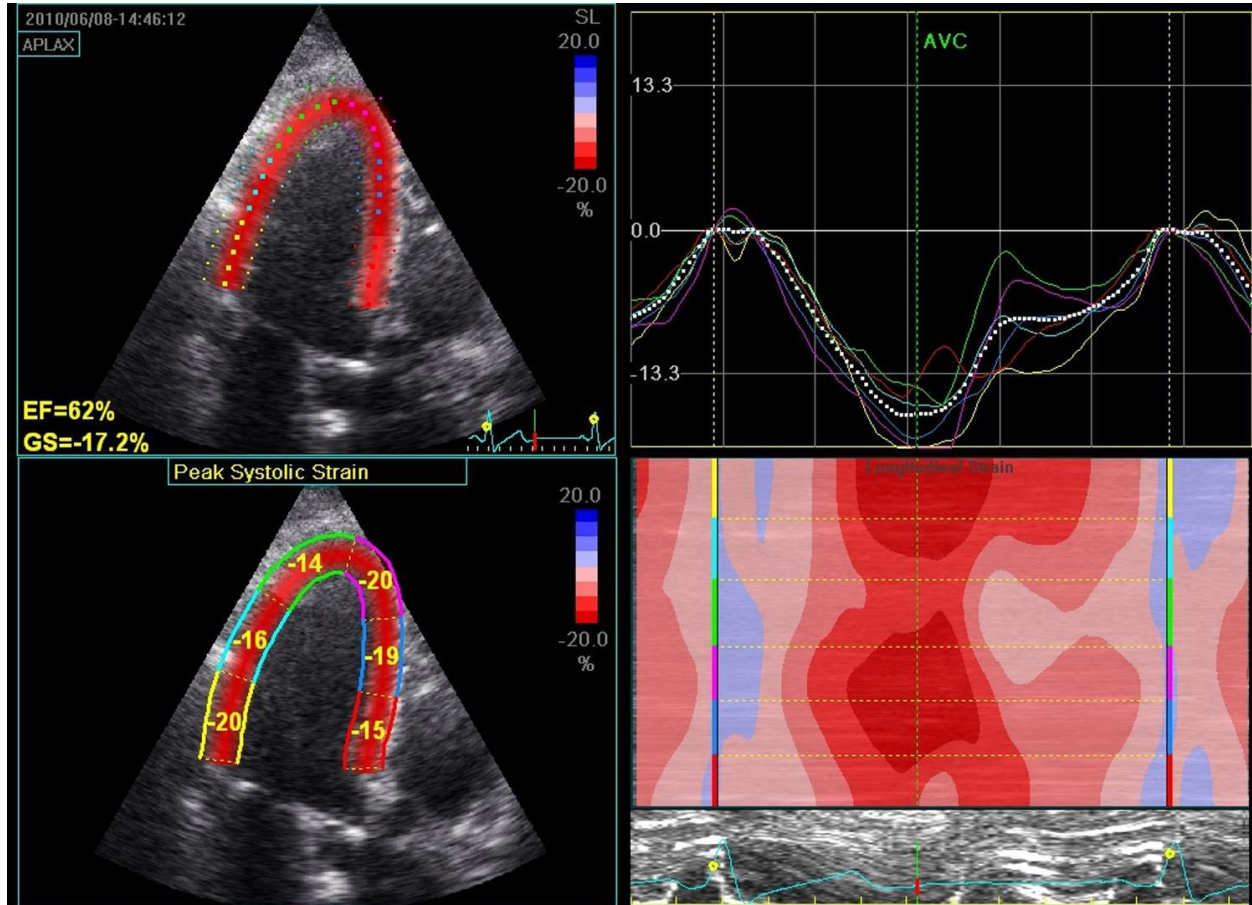

*Supplementary Figure 3.* Echocardiographic example of patient with RA with diastolic HF and reduced GLS ( $-17.2\%$ ) and normal LVEF ( $EF = 62\%$ ) in 3-chamber view. Original registration of EchoPAC software (EchoPAC version 6.1 workstation; GE Vingmed Ultrasound AS). RA: rheumatoid arthritis; HF: heart failure; DAS28: 28-joint disease activity score; GLS: global longitudinal strain; LVEF: left ventricular ejection fraction.
